# Supplementary material
Source: PubMed Central journal article supplement (PMC5038086)
Supplement: IAI.00359-16_zii999091840so1.pdf [file IAI.00359-16_zii999091840so1.pdf]

## Supplemental data

**Fig. S1. Experimental scheme for the DNA vaccination.** Each animal was i.m. injected following a prime/boost scheme on day 0, 21 and 42. On day 56, mice were aerosolically challenged with *M. abscessus*. On day 57, 63, 70 and 77, mice were sacrificed, blood samples were collected and lungs, spleen and liver *M. abscessus* CFU were counted.

**Fig. S2. Phylogenetic analysis of *M. abscessus* MgtC-like proteins.** Phylogenetic tree includes MgtC proteins from opportunist bacterial pathogens found in CF patients (*P. aeruginosa*, *B. cenocepacia*, *M. avium*, *S. maltophilia*, *A. fumigatus*) as well as other bacterial pathogens for which MgtC role in virulence has been studied (*S. Typhimurium*, *M. tuberculosis*, *Brucella* species, *Y. pestis*). Phylogenetic analyses were carried out with the “Phylogeny.fr” web server (<http://www.phylogeny.fr>) using MUSCLE, PhyML and TreeDyn softwares. *Escherichia coli* YhiD is a distantly related MgtC-like protein used to root the tree.

**Fig. S3.** Complementation of the growth defect of  $\Delta mgtC_{MAB}$  in  $Mg^{2+}$  deprived liquid medium. Growth curves of wild-type,  $\Delta mgtC_{MAB}$  and  $\Delta mgtC_{MAB} + mgtC$  strains grown in Sauton’s medium without magnesium (left panel) or in Sauton’s medium supplemented with magnesium (right panel). OD<sub>600</sub> is indicated over the growth period. The experiment was independently repeated three times.

**Fig. S4.** Replication of *M. abscessus* wild-type strain and *mgtC* mutant in THP1 macrophages cell line after 48 h. Results are expressed as means + SD from three independent experiments.

The difference of replication rate between the two strains is not significant (P=0.25, Student's test).

**Fig. S5. Specificity of antibodies present in serum of mice immunized with *mgtC<sub>MAB</sub>* DNA.** Sera were tested in western-blot against a total lysate of *M. smegmatis* overexpressing the recombinant MgtC<sub>MAB</sub> protein tagged with a C-terminal poly-Histidine (lanes M) or another *M. abscessus* recombinant protein His-tagged, MAB\_2545c (lanes N). Control blot was carried out with an anti-poly-Histidine antibody (Sigma), lane His; Blotting results of sera diluted at 1:1000 from three mice (M1, M2 and M3); Molecular standard, lane S. Mice sera revealed a single band, co-migrating with the band revealed by anti-His antibody, thus indicating that mice sera recognized specifically the His-tagged MgtC<sub>MAB</sub> antigen.

Table S1. Primer list

| Primer name      | Primer sequence                                  |
|------------------|--------------------------------------------------|
| MAB3593-Sph-F    | 5'- ACATGCATGCGCCATTGGGATGTCGTC -3'              |
| MAB3593-Hind-R   | 5'- CCCAAGCTTTTACCATTTCGCTGGCTTCG -3'            |
| MAB0146-Sph-F    | 5'- ACATGCATGCCACTTGCGGATTCTGTG -3'              |
| MAB0146-Hind-R   | 5'- CCCAAGCTTCTACTCGATATCGTCGCCAAG -3'           |
| MAB3593-W227A-F  | 5'- GTCTCGTCGGTGC GCGCGCATATCGATCGCGAG -3'       |
| MAB3593-W227A-R  | 5'- CTCGCGATCGATATGCGCGCGCACCCGACGAGAC -3'       |
| AM-MgtC F        | 5'- ACGGCGTTGATCCAGATATT -3'                     |
| AM-MgtC R        | 5'- TTTCGACTGAGCCTTTCGTTGCCGAATCCGAGTGCTATG -3'  |
| AV-MgtC F        | 5'- AGTTTTTCGTTCCACTGAGCGCCGCGTATCTCTTCGAGGT -3' |
| AV-MgtC R        | 5'- GCACGCTGACAGAGAAGTTG -3'                     |
| Zeo-MgtC F       | 5'- CATAGCACTCGGATTCGGCAACGAAAGGCTCAGTCGAAA -3'  |
| Zeo-MgtC R       | 5'- ACCTCGAAGAGATACGCGGCGCTCAGTGGAACGAAA ACT -3' |
| screening 7      | 5'- CATAGCACTCGGATTCGGC -3'                      |
| screening 8      | 5'- ACCTCGAAGAGATACGCGG -3'                      |
| MgtC-reg-PvuII   | 5'- GTGCA CAGCTG CCCGAATGTCCGACGATGTA -3'        |
| MgtC-reg-HindIII | 5'- ATGGG AAGCTT TTACCATTTCGCTGGCTTCGAC -3'      |

---
