# Supplementary material
Source: PubMed Central journal article supplement (PMC5038086)

**Fig. S1**

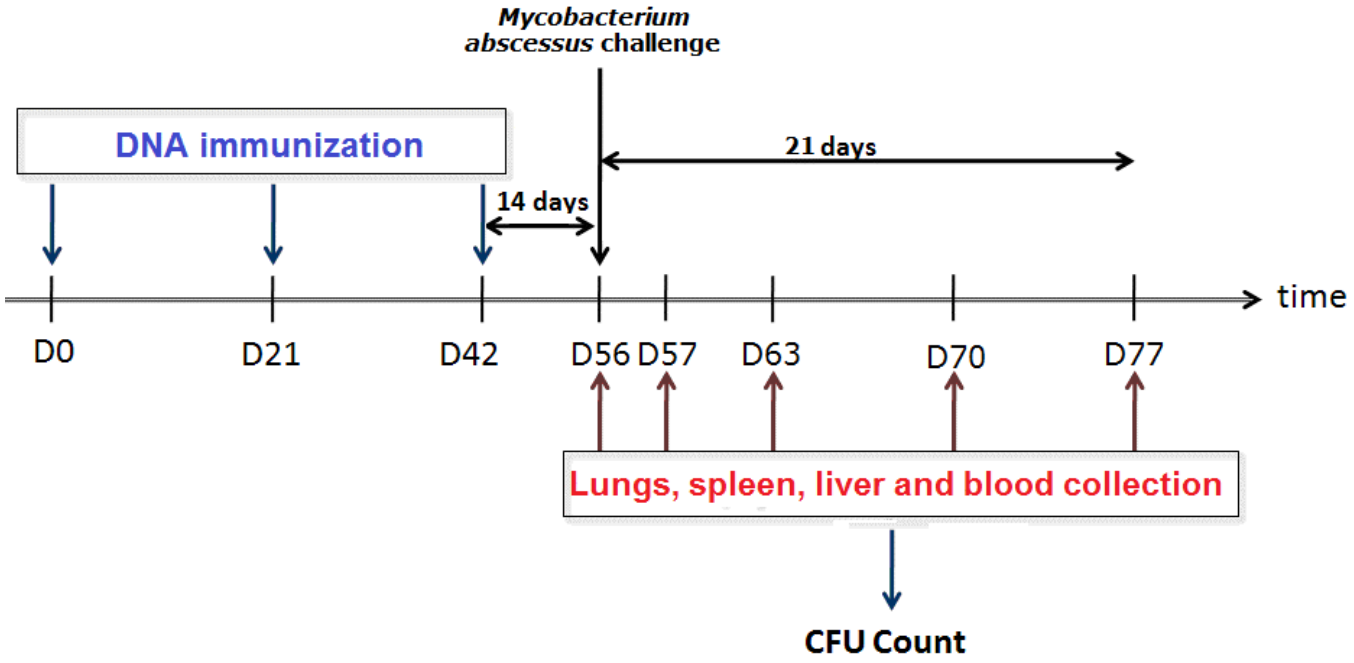

Fig. S2

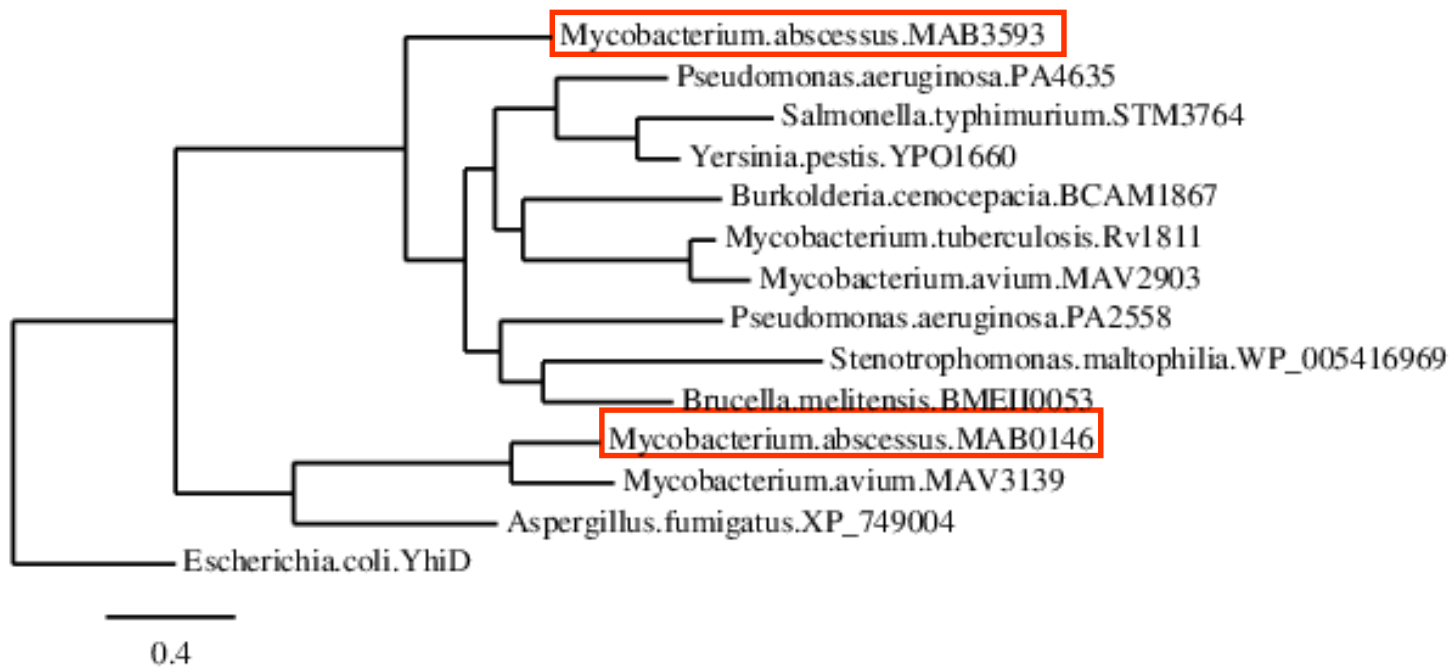

**Fig. S3**

**A**

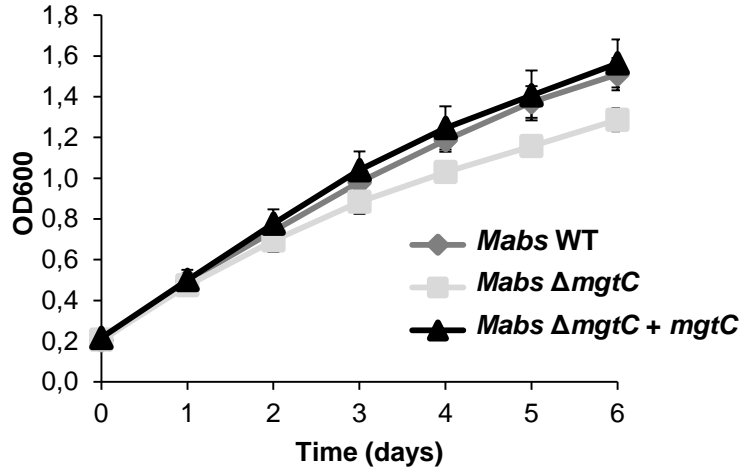

**B**

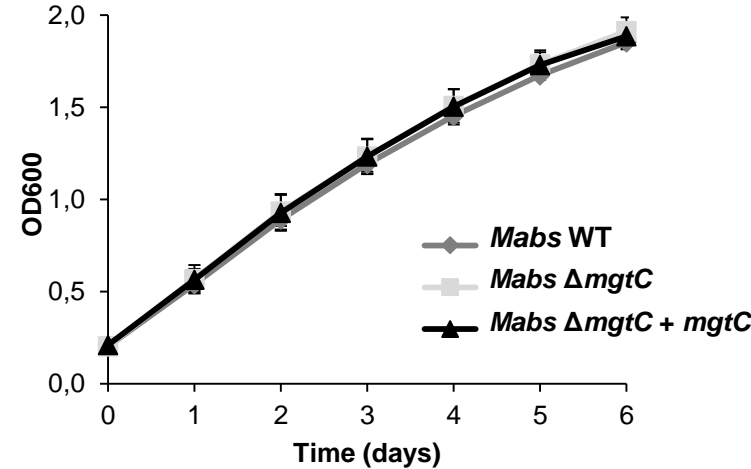

**Fig. S4**

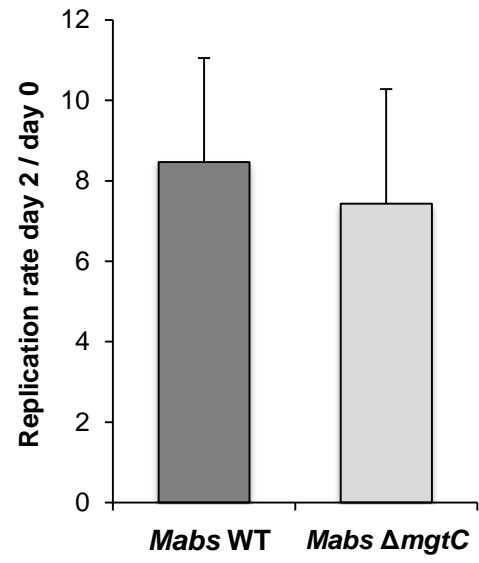

**Fig. S5**

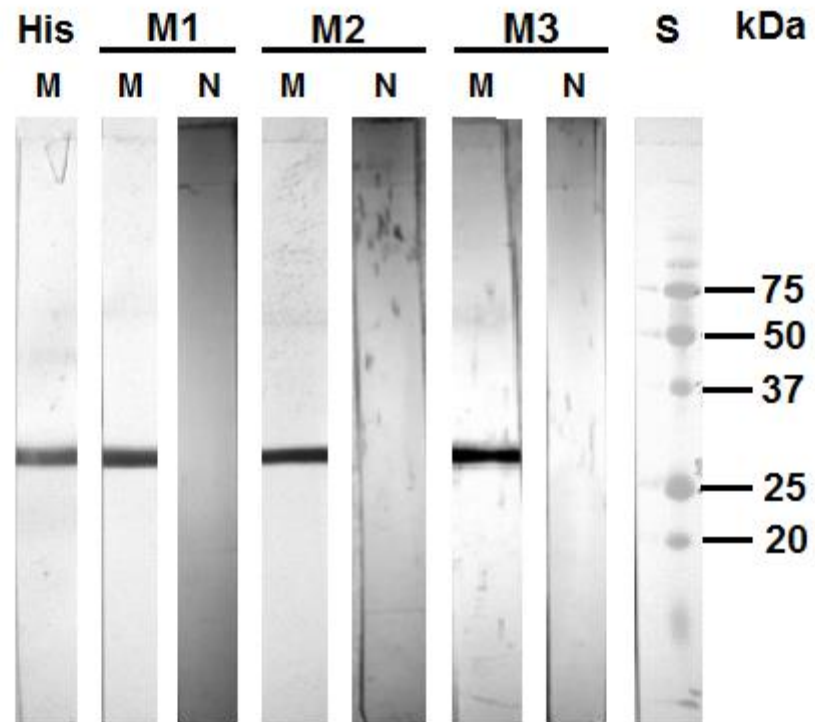

Supplement: IAI.00359-16_zii999091840so2.pdf [file IAI.00359-16_zii999091840so2.pdf]
